# Supplementary material for: Neuroprotective effects of intrastriatal injection of rapamycin in a mouse model of excitotoxicity induced by quinolinic acid
Source: Springer Nature journal article supplement (doi:10.1186/s12974-017-0793-x), 2017-01-31
Supplement: MOESM1 [file 12030088]

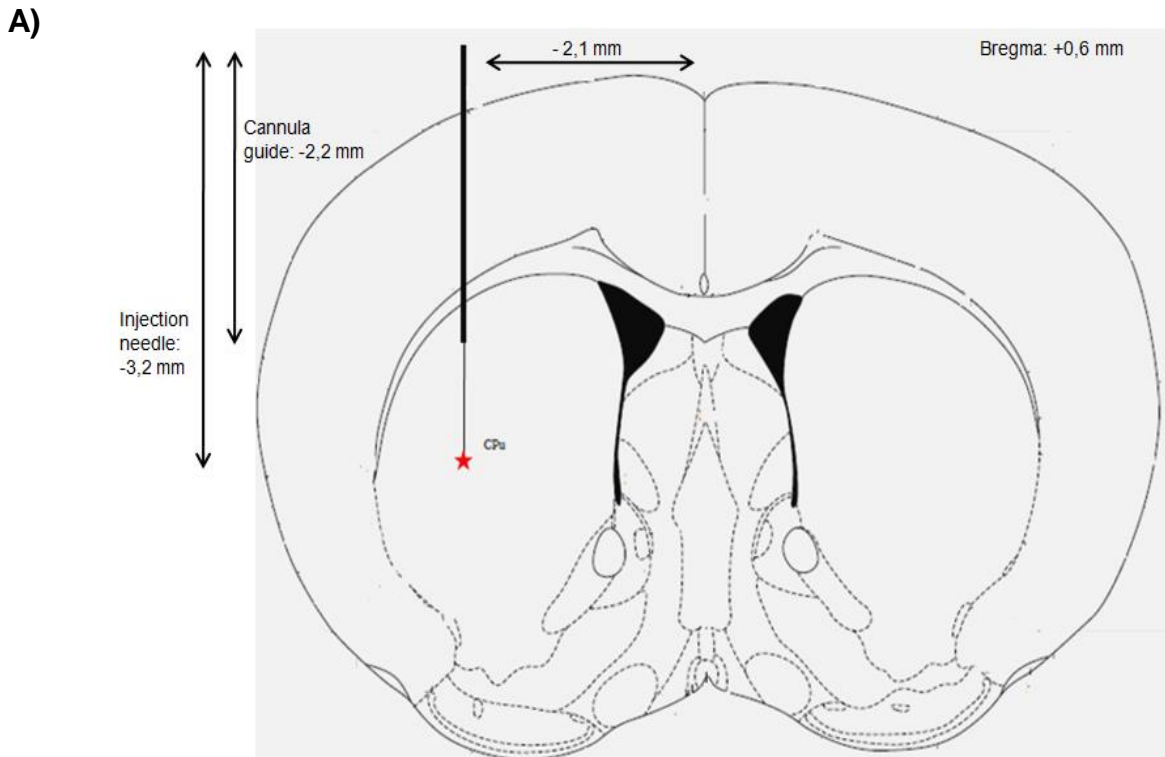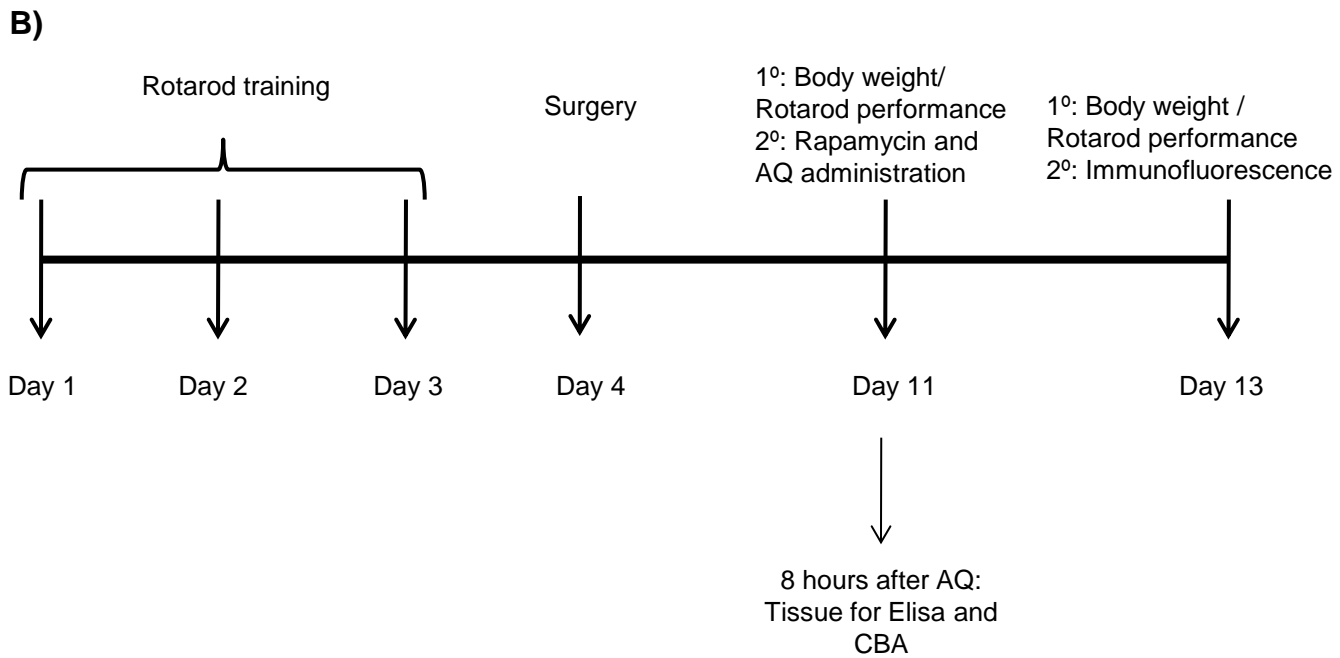

Supplementary Fig. 1
