# Supplementary material for: Neuroprotective effects of intrastriatal injection of rapamycin in a mouse model of excitotoxicity induced by quinolinic acid
Source: Springer Nature journal article supplement (doi:10.1186/s12974-017-0793-x), 2017-01-31
Supplement: MOESM3 [file 12030088]

## SUPPLEMENTARY DATA

### Raw data - Figure 1

% seconds as compared with basal

| <b>Vehicle +<br/>PBS</b> | <b>Rapa 0.2 +<br/>PBS</b> | <b>Vehicle + QA<br/>200</b> | <b>Rapa 0.2 + QA<br/>200</b> | <b>Rapa 2 + QA<br/>200</b> | <b>Rapa 20 + QA<br/>200</b> |
|--------------------------|---------------------------|-----------------------------|------------------------------|----------------------------|-----------------------------|
| 171,9                    | 86,9                      | 38,6                        | 101,1                        | 55,4                       | 109,3                       |
| 169,6                    | 139,4                     | 56,2                        | 101,1                        | 106,4                      | 13,3                        |
| 122,5                    | 124,1                     | 9,1                         | 26,8                         | 3,4                        | 103,8                       |
| 175,7                    | 52                        | 45,2                        | 102,6                        | 83,4                       | 36,8                        |
| 88,1                     | 116,1                     | 74,2                        | 64,7                         | 9,4                        | 21,1                        |
| 99,3                     | 79,8                      | 97,7                        | 172,1                        | 16,9                       | 6,6                         |
| 36,3                     | 153,5                     | 87,5                        | 16,6                         | 60,2                       | 64,6                        |
| 97,1                     | 163,6                     | 45                          | 120,1                        | 13,8                       | 174,5                       |
| 89,1                     |                           | 74,8                        | 120,3                        | 77,9                       | 113,8                       |
| 96                       |                           | 92,1                        | 149,7                        | 81,3                       | 27,4                        |
| 74,7                     |                           | 78                          | 63,1                         | 67,7                       | 15,4                        |
| 98,3                     |                           | 70,5                        | 68,9                         | 31,6                       | 60                          |
| 123,8                    |                           | 68,7                        | 40,3                         | 48,6                       | 206                         |
| 101,7                    |                           |                             | 134,2                        | 75,9                       | 111,7                       |
|                          |                           |                             | 89,4                         |                            |                             |

## SUPPLEMENTARY DATA

Raw data – Figure 2

cells / mm<sup>2</sup>

| <b>Vehicle + PBS</b> | <b>Vehicle + QA<br/>200</b> | <b>Rapa 0.2 + QA<br/>200</b> | <b>Rapa 2 + QA 200</b> | <b>Rapa 20 + QA<br/>200</b> |
|----------------------|-----------------------------|------------------------------|------------------------|-----------------------------|
| 0,00006593           | 0,00038625                  | 0,00025345                   | 0,00035799             | 0,00018933                  |
| 0,00005437           | 0,00028394                  | 0,00025398                   | 0,00032015             | 0,00030145                  |
| 0,00003145           | 0,0002119                   | 0,00026239                   | 0,0002439              | 0,00019098                  |
| 0,00005411           | 0,00033242                  | 0,00013107                   | 0,00029885             | 0,0002281                   |
| 0,00000385           | 0,00034347                  | 0,00018794                   | 0,00030882             | 0,00026943                  |
| 0,00000889           |                             | 0,00018664                   | 0,00025127             |                             |
| 0,00000432           |                             | 0,00015253                   |                        |                             |

## SUPPLEMENTARY DATA

### Raw data – Figure 3

#### Glutamate release (nMol/mg of protein)

| KCL      | PBS      | QA_10 mM | QA_5 mM  | QA_0.5 mM | QA_0.1 mM |
|----------|----------|----------|----------|-----------|-----------|
| 54,6875  | 37,04637 | 258,9799 | 121,3992 | 53,125    | 83,33334  |
| 45,53312 | 47,95259 | 282,8351 | 124,6936 | 62,5      | 25,58479  |
| 26,26568 | 15,27309 | 168,4669 |          | 86,17424  | 68,45238  |

#### Glutamate release (% of QA group)

| KCI       | PBS      | QA 5mM   | Rapa<br>0.0001nM+<br>QA 5mM | Rapa<br>0.001nM+Q<br>A 5mM | Rapa<br>0.05nM+QA<br>5mM | Rapa<br>0.25nM+QA<br>5mM |
|-----------|----------|----------|-----------------------------|----------------------------|--------------------------|--------------------------|
| 0,8438104 | 2,293592 | 29,0063  | 38,24446                    | 92,03006                   | 120,3827                 | 202,79                   |
| 1,581473  | 2,526438 | 147,0392 | 9,353518                    | 125,2118                   | 159,9353                 | 90,44333                 |
| 1,991208  | 11,22537 | 47,28137 | 19,9213                     | 79,172                     | 252,8381                 | 183,3908                 |
| 3,511448  | 4,339294 | 176,6731 | 18,40929                    | 108,9217                   | 136,5946                 |                          |
| 2,343265  | 33,1403  | 85,36245 | 62,59767                    | 21,0634                    |                          |                          |
| 2,996344  | 8,900649 | 108,7583 |                             | 16,63208                   |                          |                          |
| 11,87992  | 8,655149 | 105,8792 |                             | 17,14577                   |                          |                          |
| 16,50738  | 3,065053 | 135,0118 |                             | 27,21307                   |                          |                          |
| 11,62102  | 4,734305 | 50,44202 |                             | 20,97952                   |                          |                          |
|           |          | 114,5461 |                             |                            |                          |                          |

## SUPPLEMENTARY DATA

### Raw data – Figure 4

#### BDNF (pg/mg of protein)

| Vehicle + PBS | Vehicle + QA 200 | Rapa 0.2 + QA 200 | Rapa 2 + QA 200 | Rapa 20 + QA 200 |
|---------------|------------------|-------------------|-----------------|------------------|
| 544,976       | 337,59           | 389,735           | 401,024         | 399,866          |
| 692,675       | 475,153          | 454,368           | 289,644         | 404,792          |
| 409,749       | 443,395          | 556,819           | 433,258         | 378,631          |
| 958,755       | 614,482          | 384,249           | 588,918         | 547,469          |
| 725,178       | 376,826          | 660,524           | 652,053         | 515,813          |
| 391,234       | 572,615          | 354,14            | 494,364         | 501,72           |
|               | 554,118          | 675,592           | 230,818         | 260,729          |

#### NGF (pg/mg of protein)

| Vehicle + PBS | Vehicle + QA 200 | Rapa 0.2 + QA 200 | Rapa 2 + QA 200 | Rapa 20 + QA 200 |
|---------------|------------------|-------------------|-----------------|------------------|
| 315,527       | 285,03           | 269,462           | 187,642         | 208,324          |
| 473,249       | 214,727          | 330,722           | 136,585         | 524,633          |
| 803,598       | 532,176          | 358,875           | 582,649         | 100,755          |
| 423,464       | 201,191          | 192,936           | 393,165         | 409,293          |
| 280,106       | 302,038          | 450,163           | 449,313         | 331,593          |
|               | 253,688          | 222,414           | 482,307         | 153,223          |
|               |                  | 594,018           | 101,415         | 263,993          |

**SUPPLEMENTARY DATA**

**Raw data – Figure 5**

**IL-1 $\beta$  (pg/mg of protein)**

| <b>Vehicle + PBS</b> | <b>Vehicle + QA 200</b> | <b>Rapa 0.2 + QA 200</b> | <b>Rapa 2 + QA 200</b> | <b>Rapa 20 + QA 200</b> |
|----------------------|-------------------------|--------------------------|------------------------|-------------------------|
| 528,156              | 495,503                 | 458,077                  | 197,555                | 205,689                 |
| 467,451              | 968,268                 | 235,196                  | 176,945                | 294,805                 |
| 302,714              | 467,778                 | 317,032                  | 599,584                | 313,041                 |
| 598,292              | 1069,627                | 230,019                  | 343,754                | 176,983                 |
| 528,159              | 504,36                  | 255,459                  | 238,631                | 566,087                 |
| 388,644              | 699,872                 | 376,884                  | 128,938                | 419,173                 |
|                      |                         |                          |                        | 193,065                 |

**IL-6 (pg/mg of protein)**

| <b>Vehicle + PBS</b> | <b>Vehicle + QA 200</b> | <b>Rapa 0.2 + QA 200</b> | <b>Rapa 2 + QA 200</b> | <b>Rapa 20 + QA 200</b> |
|----------------------|-------------------------|--------------------------|------------------------|-------------------------|
| 1235,156             | 7216,393                | 3329,378                 | 5660,066               | 402,38                  |
| 640,756              | 11104,52                | 2181,897                 | 2121,525               | 774,766                 |
| 155,806              | 3934,618                | 1408,739                 | 786,49                 | 1752,694                |
| 1539,635             | 10837,03                | 2309,943                 | 7724,218               | 192,369                 |
| 739,47               | 4754,805                | 5553,904                 | 2344,695               | 3708,84                 |
| 1025,268             | 9200,543                | 2439,528                 | 2688,119               | 3764,984                |
|                      | 3738,504                | 1087,298                 | 501,581                | 1284,905                |

**TNF-a (pg/mg of protein)**

| <b>Vehicle + PBS</b> | <b>Vehicle + QA 200</b> | <b>Rapa 0.2 + QA 200</b> | <b>Rapa 2 + QA 200</b> | <b>Rapa 20 + QA 200</b> |
|----------------------|-------------------------|--------------------------|------------------------|-------------------------|
| 18,989               | 167,186                 | 63,679                   | 104,137                | 8,14                    |
| 55,281               | 254,79                  | 40,688                   | 41,45                  | 11,554                  |
| 13,299               | 112,621                 | 25,328                   | 22,799                 | 21,627                  |
| 57,728               | 617,617                 | 49,472                   | 81,091                 | 5,951                   |
| 42,254               | 123,658                 | 178,23                   | 93,028                 | 59,115                  |
| 36,643               | 187,291                 | 53,196                   | 23,284                 | 111,412                 |
|                      | 65,381                  | 27,463                   | 15,444                 | 24,496                  |

**IL-10 (pg/mg of protein)**

| <b>Vehicle + PBS</b> | <b>Vehicle + QA<br/>200</b> | <b>Rapa 0.2 + QA<br/>200</b> | <b>Rapa 2 + QA 200</b> | <b>Rapa 20 + QA<br/>200</b> |
|----------------------|-----------------------------|------------------------------|------------------------|-----------------------------|
| 3,687                | 1,547                       | 54,271                       | 5,837                  | 1,756                       |
| 25,557               | 4,123                       | 39,241                       | 8,025                  | 11,614                      |
| 6,261                | 54,665                      | 29,629                       | 25,301                 | 5,037                       |
| 28,084               | 48,105                      | 34,887                       | 14,527                 | 1,962                       |
| 3,902                | 12,936                      | 38,078                       | 14,35                  | 18,33                       |
| 5,34                 | 21,675                      | 28,088                       | 12,448                 | 35,407                      |
|                      | 2,484                       |                              | 0,872                  | 6,711                       |

**IFN- $\gamma$  (pg/mg of protein)**

| <b>Vehicle + PBS</b> | <b>Vehicle + QA<br/>200</b> | <b>Rapa 0.2 + QA<br/>200</b> | <b>Rapa 2 + QA 200</b> | <b>Rapa 20 + QA<br/>200</b> |
|----------------------|-----------------------------|------------------------------|------------------------|-----------------------------|
| 3,293                | 2,383                       | 2,651                        | 2,569                  | 1,461                       |
| 6,435                | 3,763                       | 2,981                        | 1,718                  | 1,967                       |
| 3,406                | 2,144                       | 2,795                        | 1,765                  | 3,118                       |
| 3,965                | 2,866                       | 2,628                        | 2,796                  | 1,694                       |
| 2,708                | 1,948                       | 2,513                        | 2,688                  | 2,089                       |
| 2,605                | 2,878                       | 1,643                        | 2,107                  | 2,24                        |
|                      | 2,251                       | 2,527                        | 1,052                  | 1,257                       |

**IL-2 (pg/mg of protein)**

| <b>Vehicle + PBS</b> | <b>Vehicle + QA<br/>200</b> | <b>Rapa 0.2 + QA<br/>200</b> | <b>Rapa 2 + QA 200</b> | <b>Rapa 20 + QA<br/>200</b> |
|----------------------|-----------------------------|------------------------------|------------------------|-----------------------------|
| 6,275                | 4,676                       | 5,07                         | 3,966                  | 3,114                       |
| 12,074               | 6,324                       | 5,653                        | 3,163                  | 3,318                       |
| 6,266                | 4,696                       | 5,581                        | 3,33                   | 6,201                       |
| 8,65                 | 5,723                       | 5,679                        | 5,864                  | 3,287                       |
| 5,246                | 3,402                       | 5,344                        | 5,793                  | 4,215                       |
| 4,182                | 5,821                       | 3,55                         | 4,134                  | 4,566                       |
|                      | 4,216                       | 5,662                        | 2,04                   | 2,405                       |

**IL- 4 (pg/mg of protein)**

| <b>Vehicle + PBS</b> | <b>Vehicle + QA<br/>200</b> | <b>Rapa 0.2 + QA<br/>200</b> | <b>Rapa 2 + QA 200</b> | <b>Rapa 20 + QA<br/>200</b> |
|----------------------|-----------------------------|------------------------------|------------------------|-----------------------------|
| 1,136                | 0,867                       | 1,08                         | 0,642                  | 0,503                       |
| 1,144                | 1,028                       | 0,952                        | 0,626                  | 0,713                       |
| 1,445                | 0,801                       | 0,969                        | 0,734                  | 1,09                        |
| 1,000                | 0,979                       | 0,916                        | 1,147                  | 0,651                       |
| 0,743                | 0,584                       | 0,623                        | 1,103                  | 0,77                        |
|                      | 1,078                       | 0,971                        | 0,766                  | 0,757                       |
|                      | 0,721                       |                              | 0,404                  | 0,463                       |

**IL-17A (pg/mg of protein)**

| <b>Vehicle + PBS</b> | <b>Vehicle + QA<br/>200</b> | <b>Rapa 0.2 + QA<br/>200</b> | <b>Rapa 2 + QA 200</b> | <b>Rapa 20 + QA<br/>200</b> |
|----------------------|-----------------------------|------------------------------|------------------------|-----------------------------|
| 2,356                | 3,208                       | 2,654                        | 2,24                   | 1,073                       |
| 2,992                | 2,802                       | 2,489                        | 2,063                  | 1,379                       |
| 3,367                | 1,595                       | 2,596                        | 1,22                   | 2,44                        |
| 1,97                 | 2,93                        | 2,321                        | 2,378                  | 1,284                       |
| 2,026                | 1,375                       | 3,383                        | 1,507                  | 2,025                       |
|                      | 3,179                       | 1,616                        | 0,825                  | 1,629                       |
|                      | 2,518                       | 1,828                        |                        | 0,945                       |

## SUPPLEMENTARY DATA

### Raw data – Figure 6

cell area / number of cells (mm<sup>2</sup>)

| <b>Vehicle + PBS</b> | <b>Vehicle + QA<br/>200</b> | <b>Rapa 0.2 + QA<br/>200</b> | <b>Rapa 2 + QA 200</b> | <b>Rapa 20 + QA<br/>200</b> |
|----------------------|-----------------------------|------------------------------|------------------------|-----------------------------|
| 0,921                | 1,829                       | 1,209                        | 1,712                  | 1,486                       |
| 0,843                | 1,209                       | 1,172                        | 1,39                   | 1,288                       |
| 1,232                | 1,371                       | 1,589                        | 1,379                  | 1,197                       |
| 1,06                 | 1,387                       | 1,436                        |                        | 1,091                       |



## SUPPLEMENTARY DATA

### Raw data - Supplementary Figure 2

#### Weight (g)

##### 0 day

| <b>Vehicle +<br/>PBS</b> | <b>Rapa 0.2 +<br/>PBS</b> | <b>Vehicle + AQ<br/>200</b> | <b>Rapa 0.2 +<br/>QA 200</b> | <b>Rapa 2 + QA<br/>200</b> | <b>Rapa 20 + QA<br/>200</b> |
|--------------------------|---------------------------|-----------------------------|------------------------------|----------------------------|-----------------------------|
| 23                       | 25                        | 22                          | 24                           | 26                         | 23                          |
| 23                       | 25                        | 24                          | 23                           | 27                         | 25                          |
| 24                       | 23                        | 25                          | 27                           | 25                         | 26                          |
| 24                       | 24                        | 24                          | 25                           | 24                         | 27                          |
| 24                       | 23                        | 26                          | 24                           | 26                         | 25                          |
| 22                       | 25                        | 27                          | 21                           | 26                         | 24                          |
| 25                       | 23                        | 25                          | 27                           | 24                         | 24                          |
| 24                       | 22                        | 25                          | 23                           | 25                         | 24                          |

##### 2 days

| <b>Vehicle +<br/>PBS</b> | <b>Rapa 0.2 +<br/>PBS</b> | <b>Vehicle + AQ<br/>200</b> | <b>Rapa 0.2 +<br/>QA 200</b> | <b>Rapa 2 + QA<br/>200</b> | <b>Rapa 20 + QA<br/>200</b> |
|--------------------------|---------------------------|-----------------------------|------------------------------|----------------------------|-----------------------------|
| 23                       | 26                        | 17                          | 26                           | 24                         | 24                          |
| 24                       | 25                        | 21                          | 24                           | 24                         | 19                          |
| 23                       | 23                        | 25                          | 25                           | 25                         | 23                          |
| 24                       | 21                        | 23                          | 24                           | 23                         | 25                          |
| 25                       | 23                        | 26                          | 21                           | 25                         | 22                          |
| 22                       | 26                        | 27                          | 21                           | 26                         | 22                          |
| 26                       | 23                        | 23                          | 25                           | 21                         | 24                          |
| 24                       | 23                        | 25                          | 23                           | 26                         | 24                          |
